# Supplementary material for: Dual-luminescent Sc2(MoO4)3:Dy3+/Eu3+ phosphor system: energy transfer dynamics and high-sensitivity temperature sensing
Source: Royal Society of Chemistry journal article supplement (doi:10.1039/d5ra04860e), 2025-01-01
Supplement: d5ra04860e1.pdf [file d5ra04860e1.pdf]

## **Dual-Luminescent $\text{Sc}_2(\text{MoO}_4)_3\text{:Dy}^{3+}/\text{Eu}^{3+}$ Phosphor System: Energy Transfer Dynamics and High-Sensitivity Temperature Sensing**

Zhengrong Xia<sup>a</sup>, Rongqing Li<sup>a</sup>, Fangfang Liu<sup>a</sup>, Weiwei Zhou<sup>a,\*</sup>, Wang Zhao<sup>a</sup>, Mingjun Song<sup>c,\*</sup>

Junpeng Xue<sup>b,\*</sup>

<sup>a</sup> Anhui Engineering Research Center for Photoelectrocatalytic Electrode Materials, School of Electrical Engineering, Huainan Normal University, Huainan 232038, China

<sup>b</sup> School of Science, Jiangsu University of Science and Technology, Zhenjiang 212100, China

<sup>c</sup> School of Chemistry, Chemical and Environmental Engineering, Weifang University, Weifang 261061, China

\* Corresponding author.

E-mail address: wwzhou@hnnu.edu.cn (W.W. Zhou); smj521209@126.com (M.J. Song); xjplane@126.com (J. P. Xue)

## 1. Experimental section

### 1.1 Raw materials and synthesis

A series of  $\text{SMO}:x\text{Dy}^{3+}$  ( $x = 0.01-0.08$ ),  $\text{SMO}:0.02\text{Eu}^{3+}$ , and  $\text{SMO}:0.02\text{Dy}^{3+},y\text{Eu}^{3+}$  ( $y = 0-0.09$ ) phosphors were synthesized via a high-temperature solid-state reaction. Stoichiometric amounts of  $\text{Sc}_2\text{O}_3$  (99.99%),  $\text{MoO}_3$  (99.90%),  $\text{Dy}_2\text{O}_3$  (99.99%), and  $\text{Eu}_2\text{O}_3$  (99.99%) were precisely weighed, homogenized by mechanical mixing for 30 minutes. The two steps heating were adopted, firstly at 873 K for 6 h and then 1173 K for 12 h in atmospheric environment using muffle furnace. The heating and cooling rates employed in the synthesis process were both 3 K/min.

### 1.2 Characterization techniques

Phase purity was verified by XRD measurements using a Rigaku D/Max2000 diffractometer. The morphology and particle size of the phosphors were analyzed with a FEI Nova NanoSEM450 scanning electron microscope (SEM). UV-vis DRS were acquired using a Shimadzu UV3600 PLUS spectrophotometer. PL and PL excitation (PLE) spectra were recorded on a fluorescence spectrophotometer (model F-4600, Hitachi Ltd., Tokyo, Japan) equipped with a 150 W xenon arc lamp. All characterizations were performed at room temperature under ambient conditions.

### 1.3 DFT calculations and Rietveld refinement

All density functional theory (DFT) calculations were performed using the Vienna Ab initio Simulation Package (VASP).<sup>1,2</sup> The exchange-correlation functional was treated with the Perdew-Burke-Ernzerhof (PBE) generalized gradient approximation (GGA).

<sup>3</sup> Electron-ion interactions were described using the projector augmented wave (PAW) method.<sup>4</sup> A plane-wave basis set cutoff energy of 400 eV was employed, and Brillouin zone integration was sampled using a  $3 \times 3 \times 1$  Monkhorst-Pack  $k^*$ -point mesh. Self-consistent field iterations were converged to thresholds of  $10^{-4}$  eV for the total energy and 0.02 eV  $\text{\AA}^{-1}$  for atomic forces. Van der Waals interactions were incorporated using the DFT-D3 correction scheme.<sup>5</sup> Rietveld structural refinement of

$\text{Sc}_2(\text{MoO}_4)_3: 0.02\text{Dy}^{3+}, 0.02\text{Eu}^{3+}$  phosphors was performed using the General Structure Analysis System-II (GSAS-II) software. The baseline and peak shape were fitted using Chebyshev1 and pseudo-Voigt functions, respectively, with the structure of  $\text{Sc}_2(\text{MoO}_4)_3$  serving as the original model.

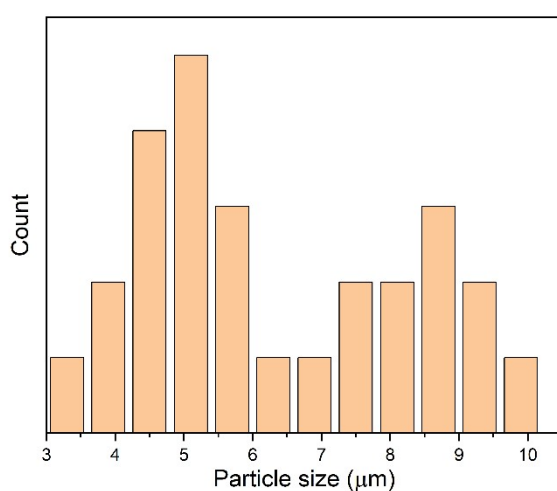

Figure S1 Particle size distribution of the  $\text{Sc}_2(\text{MoO}_4)_3: 0.02\text{Dy}^{3+}, 0.02\text{Eu}^{3+}$  phosphors.

## References

- 1 G. Kresse and J. Hafner, *Phys. Rev. B*, 1993, **47**, 558-561.
- 2 G. Kresse and J. Hafner, *Phys. Rev. B Condens. Matter*, 1994, **49**, 14251–14269.
- 3 J. P. Perdew, K. Burke and M. Ernzerhof, *Phys. Rev. Lett.*, 1996, **77**, 3865-3868.
- 4 G. Kresse and D. Joubert, *Phys. Rev. B Condens. Matter*, 1999, **59**, 1758–1775.
- 5 S. Grimme, S. Ehrlich and L. Goerigk, *J. Comput. Chem.*, 2011, **32**, 1456.
